# Supplementary material for: Phylogeography of the Cow Knob Salamander (Plethodon punctatus Highton): populations on isolated Appalachian mountaintops are disjunct but not divergent
Source: Frontiers journal article supplement (doi:10.3389/famrs.2023.1175492), 2023-08-10
Supplement: Data_Sheet_1.pdf [file Data_Sheet_1.pdf]

**SUPPORTING INFORMATION**

**Phylogeography of the Cow Knob Salamander (*Plethodon punctatus*): populations on isolated Appalachian mountaintops are disjunct but not divergent**

*Frontiers in Amphibian and Reptile Science*

Matthew R. Graham, William D. Flint, Alexis M. Powell, Victor Fet, Thomas K. Pauley

**Table S1.** Primers to used amplify DNA from *Plethodon punctatus*.

| Locus | Primer    | Sequence                              | Source                     |
|-------|-----------|---------------------------------------|----------------------------|
| Cytb  | Pglut-F1b | 5'-GGTCTGAAAAACCAATGTTGTATTC-3'       | Wiens et al. (2006)        |
|       | Pthr-R2b  | 5'-GCCCCCAATTTTGGYTTACAAG-3'          | Wiens et al. (2006)        |
| ND4   | ND4(F)    | 5'-CACCTATGACTACCAAAGCTCATGTAGAAGC-3' | Arévalo et al. (1994)      |
|       | Ephist    | 5'-TCRTTTTTAGGGTCACRGCCTAG-3'         | Wiens et al. (2006)        |
| GAPD  | GAPD-F    | 5'-ACCTTTAATGCGGGTGCTGGCATTGC-3'      | Fisher-Reid & Wiens (2011) |
|       | GAPD-R    | 5'-CATCAAGTCCACAACACGGTTGCTGTA-3'     | Fisher-Reid & Wiens (2011) |

**Literature Cited**

- Arévalo, E., Davis, S. K., & Sites Jr, J. W. (1994). Mitochondrial DNA sequence divergence and phylogenetic relationships among eight chromosome races of the *Sceloporus grammicus* complex (Phrynosomatidae) in central Mexico. *Systematic Biology*, 43(3), 387–418.
- Fisher-Reid, M. C., & Wiens, J. J. (2011). What are the consequences of combining nuclear and mitochondrial data for phylogenetic analysis? Lessons from *Plethodon* salamanders and 13 other vertebrate clades. *BMC Evolutionary Biology*, 11(1), 300.
- Wiens, J. J., Engstrom, T. N., & Chippindale, P. T. (2006). Rapid diversification, incomplete isolation, and the “speciation clock” in North American salamanders (genus *Plethodon*): testing the hybrid swarm hypothesis of rapid radiation. *Evolution*, 60(12), 2585–2603.

**Table S2.** Prior distributions of parameters used in DIYABC analysis of Cytb from *Plethodon punctatus*.

| Interpretation                       | Parameter        | Distribution | Min     | Max       | Mean                  | SD                    | Conditions         |
|--------------------------------------|------------------|--------------|---------|-----------|-----------------------|-----------------------|--------------------|
| <i>Ne</i> Northern (most recent)     | N <sub>N</sub>   | Uniform      | 10      | 100,000   | –                     | –                     | > N <sub>NB</sub>  |
| <i>Ne</i> Southern (most recent)     | N <sub>S</sub>   | Uniform      | 10      | 100,000   | –                     | –                     | > N <sub>SB</sub>  |
| <i>Ne</i> Northern (bottleneck)      | N <sub>NB</sub>  | Uniform      | 10      | 100,000   | –                     | –                     | < N <sub>NPD</sub> |
| <i>Ne</i> Southern (bottleneck)      | N <sub>SB</sub>  | Uniform      | 10      | 100,000   | –                     | –                     | < N <sub>SPD</sub> |
| <i>Ne</i> Northern (post divergence) | N <sub>NPD</sub> | Uniform      | 10      | 100,000   | –                     | –                     | –                  |
| <i>Ne</i> Southern (post divergence) | N <sub>SPD</sub> | Uniform      | 10      | 100,000   | –                     | –                     | –                  |
| Ancestral divergence time*           | t <sub>A</sub>   | Normal       | 297,100 | 1,225,000 | 761,045               | 236,700               | –                  |
| Northern expansion time              | t <sub>NE</sub>  | Uniform      | 0       | 1,225,000 | –                     | –                     | < t <sub>NB</sub>  |
| Southern expansion time              | t <sub>SE</sub>  | Uniform      | 0       | 1,225,000 | –                     | –                     | < t <sub>SB</sub>  |
| Northern bottleneck time             | t <sub>NB</sub>  | Uniform      | 0       | 1,225,000 | –                     | –                     | < t <sub>A</sub>   |
| Southern bottleneck time             | t <sub>SB</sub>  | Uniform      | 0       | 1,225,000 | –                     | –                     | < t <sub>A</sub>   |
| Mutation model (per generation)**    | U                | Normal       | –       | –         | 3.00x10 <sup>-8</sup> | 6.71x10 <sup>-9</sup> | HKY                |

\*Divergence time was estimated from the BEAST analysis. Standard deviation (SD) is based on 95% quantiles. Min and Max values are 97.5% quantiles.

\*\*Calculated using mutation rates from Kuchta et al. (2016) (mean 0.00623, SD 0.00149) scaled by a generation time of 4.5 years.

**Table S3.** Posterior distributions of parameters for Scenario 3 (Series A) from the DIYABC analysis of Cytb samples from throughout the range of *Plethodon punctatus*.

| Parameter      | Mean                  | Mode                  | Median                | q05                   | q95                   |
|----------------|-----------------------|-----------------------|-----------------------|-----------------------|-----------------------|
| N <sub>S</sub> | 202,000               | 202,000               | 198,000               | 113,000               | 306,000               |
| N <sub>N</sub> | 227,000               | 221,000               | 224,000               | 129,000               | 337,000               |
| tA             | 662,000               | 668,000               | 670,000               | 473,000               | 823,000               |
| u              | 1.59x10 <sup>-8</sup> | 1.45x10 <sup>-8</sup> | 1.57x10 <sup>-8</sup> | 1.45x10 <sup>-8</sup> | 1.84x10 <sup>-8</sup> |

**Table S4.** Comparison of scenarios tested in the DIYABC analysis. Scenarios with the highest posterior probability in each series (based on a logistic regression estimate), and non-overlapping 95% confidence intervals (in brackets), are highlighted in bold. Note that Scenario 3 had the highest posterior probability of the Series A comparisons, so it was assessed again in Series B as Scenario 1. Thus, the same scenario had the highest posterior probability values in both series.

| Scenario   | Probability Values            |
|------------|-------------------------------|
| Series A   |                               |
| Scenario 1 | 0.0598 [0.0000,0.6582]        |
| Scenario 2 | 0.1436 [0.0000,0.7887]        |
| Scenario 3 | <b>0.7966 [0.6396,0.9537]</b> |
| Series B   |                               |
| Scenario 1 | <b>0.5747 [0.5480,0.6015]</b> |
| Scenario 2 | 0.1563 [0.1026,0.2099]        |
| Scenario 3 | 0.2238 [0.1890,0.2586]        |
| Scenario 4 | 0.0452 [0.0036,0.0867]        |
| Scenario 5 | 0.0000 [0.0000,0.0000]        |
| Scenario 6 | 0.0000 [0.0000,0.0000]        |

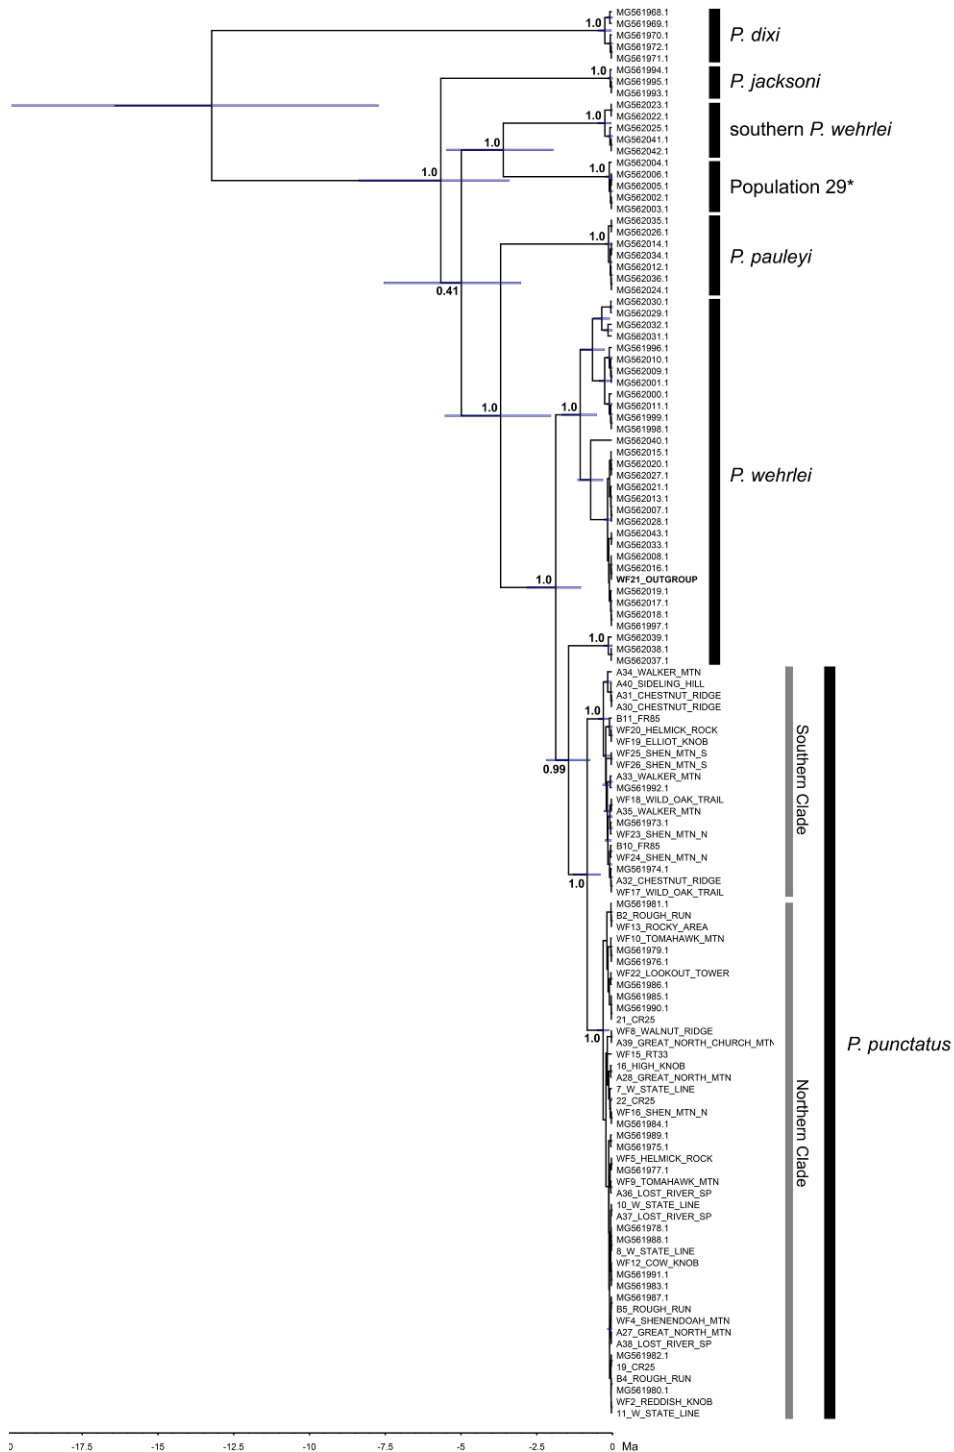

**Figure S1.** Bayesian chronogram for the *Plethodon wehrlei* species group generated using Cytb data from Kuchta et al. (2018) and this study. The *P. wehrlei* sample in bold was used as an outgroup in our analyses that focused on *P. punctatus*.

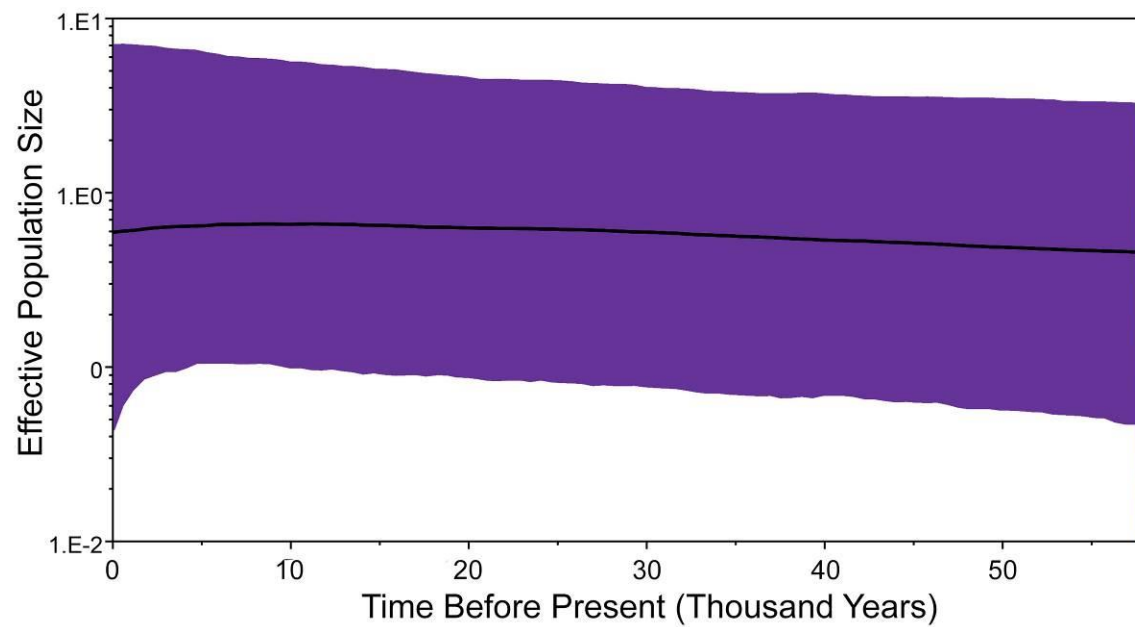

**Figure S2.** Bayesian skyride plot generated using Cytb sequences from the Southern clade of *Plethodon punctatus*.
